# Supplementary material for: Recovery of syringic acid from aqueous solution by magnetic Fe–Zn/ZIF and its slow release from the CA-coated carrier based on the 3Rs concept
Source: Royal Society of Chemistry journal article supplement (doi:10.1039/d2ce01152b), 2022-01-01
Supplement: d2ce01152b1.pdf [file d2ce01152b1.pdf]

**Recovery of syringic acid from aqueous solution by magnetic Fe-Zn/ZIF and its  
slow-release from CA-coating carrier based on a 3Rs concept**

*Huifang Zhao<sup>a</sup>, Ting Wang<sup>a</sup>, Dahuan Liu<sup>ab,\*</sup>, Qing-yuan Yang<sup>a,\*</sup>*

<sup>a</sup>State Key Laboratory of Organic-Inorganic Composites, Beijing University of Chemical  
Technology, North Third Ring Road 15, Chaoyang District, Beijing 100029, P. R. China

<sup>b</sup>College of Chemical Engineering, Qinghai University, Xining 810016, P. R. China

*\*E-mails: Dahuan\_Liu@outlook.com (D.L.); qyyang@mail.buct.edu.cn.*

## Section S1 Preparation of Materials

*Fe-Zn/ZIF*. According to the previous work,<sup>1</sup> Fe-Zn/ZIF was synthesized *via* a one-step method. Firstly, solutions A (0.6 g Zn(OAc)<sub>2</sub>·4H<sub>2</sub>O in 5 mL H<sub>2</sub>O) and B (0.6 g FeSO<sub>4</sub>·7H<sub>2</sub>O in 5 mL H<sub>2</sub>O) were thoroughly mixed. Then, 5 mL of the mixture of A and B was added to MeIM solution (2.24 g in 5 mL H<sub>2</sub>O) drop by drop. After reaction for 12 h, the Yellowish brown solid was collected using magnetism. The resulting product was washed with DI water and methanol several times. At last, the solid was dried at 353 K for 12 h.

## Section S2 Characterization of Materials

The sample powder X-ray diffraction (PXRD) patterns were recorded on a D8 Advance X diffractometer using Cu K $\alpha$  radiation ( $\lambda = 1.54178 \text{ \AA}$ ). Nitrogen adsorption-desorption isotherms measurement at 77 K was performed on an Autosorb-iQ-MP surface area analyzer. The morphology of the MOFs was characterized using a Hitachi SU8010 field emission scanning electron microscope (SEM). Magnetic properties of the ZIF and Fe-Zn/ZIF were measured with a physical property measurement system (PPMS). Infrared spectra of the samples were recorded on a Nicolet iS50 FT-IR spectrophotometer. X-ray photoelectron spectroscopy (XPS) data were obtained on an Axis Supra X-ray photoelectron spectroscope, and Al K $\alpha$  X-ray was selected as the excitation source. The drug concentration in the liquid solution was determined by measuring the absorbance at a wavelength of 265.5 nm using a UV-Visible spectrophotometer (TU-1901).

## Section S3 SA Loading

40 mg of MOF samples were soaked in 10 mL SA-containing solution with a concentration of 1000 ppm for 12 h at 298 K constant temperature shaker (pH = 7.0). After an adsorption process, the clear filtrate was collected *via* a PES microfiltration membrane with a pore size of 0.22  $\mu\text{m}$  and further

used to measure the concentration of the adsorbate *via* a UV–Vis spectrometer (TU-1901, Persee). The collected solid sample was named SA-Fe-Zn/ZIF. The drug loading capacity ( $Q$ ,  $\text{mg}\cdot\text{g}^{-1}$ ) was calculated from the following equation:<sup>2</sup>

$$Q = \frac{(C_0 - C_f)V}{m} \quad (1)$$

where  $C_0$  and  $C_f$  are initial and final concentrations ( $\text{mg}\cdot\text{g}^{-1}$ ) of SA in the solution,  $V$  is the volume (L) of the solution, and  $m$  is the mass (g) of the dried drug carrier.

#### Section S4 Release of SA

5 mg of SA-MOF was exposed to 45 mL of PBS (pH = 5.8, 7.4) solutions, respectively. And the release system was maintained at 37 °C in a shaker with a rotation speed of 150 rpm. Then, at specified time intervals, a 4 mL mixture was withdrawn and filtrated, and clear filtration solution was collected and the concentration was quantitatively analyzed by UV–vis spectroscopy. Total amounts of the drug released ( $F_t$ ) were calculated as follows:<sup>2</sup>

$$F_t = V_m C_t + \sum_{i=0}^{t-1} V_a C_i \quad (2)$$

$$\text{Cumulative release\%} = \frac{F_t}{m_{SA}} \quad (3)$$

where  $V_m$  and  $C_t$  are the volume and concentration of the drug at time  $t$ ,  $V_a$  is the volume of the sample withdrawn and  $C_i$  is the drug concentration at the time  $i$  ( $i < t$ ),  $m_{SA}$  is the mass of SA loaded in adsorbents.

## Section S5 Adsorption kinetics

pseudo-first-order model:

$$Q_t = Q_e(1 - e^{-k_1 t}) \quad (4)$$

pseudo-second-order model:

$$Q_t = \frac{Q_e k_2 t}{Q_e + k_2 t} \quad (5)$$

where  $Q_t$  ( $\text{mg} \cdot \text{g}^{-1}$ ) is the adsorption amount at time  $t$  (min),  $k_1$  ( $\text{min}^{-1}$ ) and  $k_2$  ( $\text{g} \cdot \text{min}^{-1} \cdot \text{mg}^{-1}$ ) are pseudo-first-order models and pseudo-second-order model rate constants, respectively.

## Section S6 Adsorption isotherms models

Langmuir isotherm model:

$$Q_e = \frac{Q_m C_e}{\frac{1}{b} + C_e} \quad (6)$$

Freundlich isotherm model:

$$Q_e = KC_e^{1/n} \quad (7)$$

where  $b$  ( $\text{mg} \cdot \text{g}^{-1}$ ) and  $K$  are Langmuir and Freundlich adsorption constants, respectively;  $Q_m$  is the theoretical equilibrium adsorption capacity for the Langmuir model;  $n$  is referred to the temperature-related constant of the adsorption system.

**Table S1** Source and purity of all chemicals used in the experiment.

| Chemicals                                                            | Source                                 | Purity |
|----------------------------------------------------------------------|----------------------------------------|--------|
| Zn(CH <sub>3</sub> CO <sub>2</sub> ) <sub>2</sub> ·2H <sub>2</sub> O | Shanghai Macklin Biochemical Co., Ltd. | 97 %   |
| FeSO <sub>4</sub> ·7H <sub>2</sub> O                                 | Shanghai Macklin Biochemical Co., Ltd. | 98 %   |
| MeIM                                                                 | Shanghai Macklin Biochemical Co., Ltd. | 98 %   |
| SA                                                                   | Shanghai Macklin Biochemical Co., Ltd. | 99.5 % |

**Table S2** Kinetics models parameters of SA adsorbed on the Fe-Zn/ZIF.

| $C_0$<br>( $\text{mg}\cdot\text{L}^{-1}$ ) | $Q_{e,exp}$<br>( $\text{mg}\cdot\text{g}^{-1}$ ) | Pseudo-first-order model                         |                                |        | Pseudo-second-order model                        |                                                                |        |
|--------------------------------------------|--------------------------------------------------|--------------------------------------------------|--------------------------------|--------|--------------------------------------------------|----------------------------------------------------------------|--------|
|                                            |                                                  | $Q_{e,Cal}$<br>( $\text{mg}\cdot\text{g}^{-1}$ ) | $k_1$<br>( $\text{min}^{-1}$ ) | $R^2$  | $Q_{e,Cal}$<br>( $\text{mg}\cdot\text{g}^{-1}$ ) | $k_2$<br>( $\text{g}\cdot\text{mg}^{-1}\cdot\text{min}^{-1}$ ) | $R^2$  |
| 976.4                                      | 450.6                                            | 434.3                                            | 0.0166                         | 0.9410 | 482.3                                            | 11.5864                                                        | 0.9712 |

**Table S3** Parameters in Langmuir and Freundlich models of SA adsorbed on the MOFs.

| Materials | $Q_m$<br>( $\text{mg}\cdot\text{g}^{-1}$ ) | Langmuir parameters                        |                                         |        | Freundlich parameters                                  |        |        |
|-----------|--------------------------------------------|--------------------------------------------|-----------------------------------------|--------|--------------------------------------------------------|--------|--------|
|           |                                            | $Q_m$<br>( $\text{mg}\cdot\text{g}^{-1}$ ) | $b$<br>( $\text{L}\cdot\text{g}^{-1}$ ) | $R^2$  | $K$<br>( $\text{mg}^{1-1/n}\cdot\text{g}^{-(1-1/n)}$ ) | $n$    | $R^2$  |
| Fe-Zn/ZIF | 450.6                                      | 466.6                                      | 0.02561                                 | 0.9594 | 115.3478                                               | 4.6003 | 0.9330 |

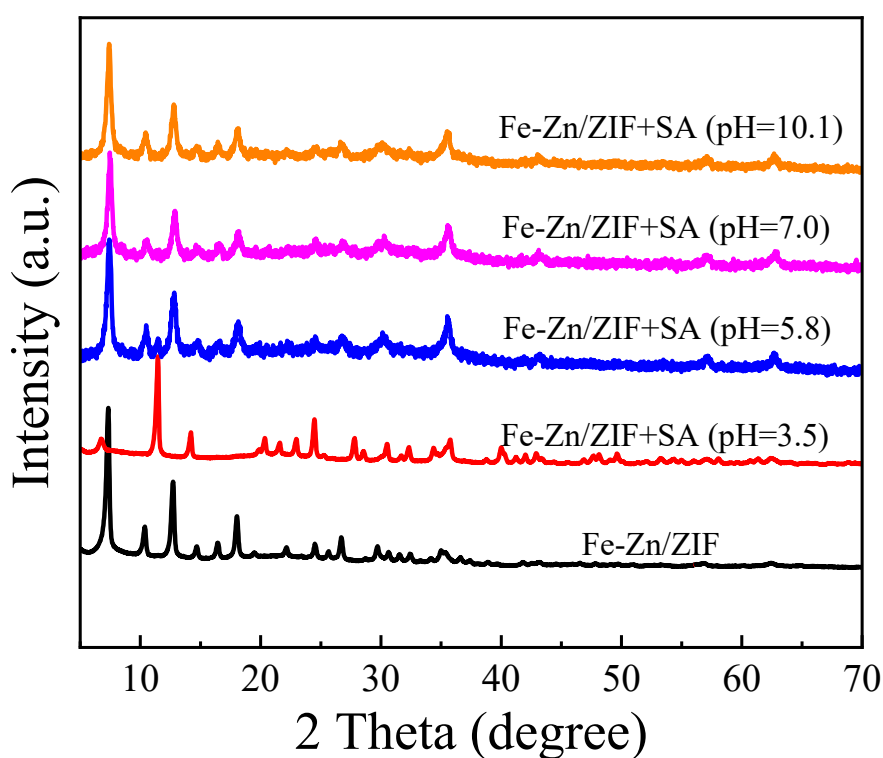**Fig. S1** The PXRD patterns of Fe-Zn/ZIF after soaking in SA solutions at different pH values.

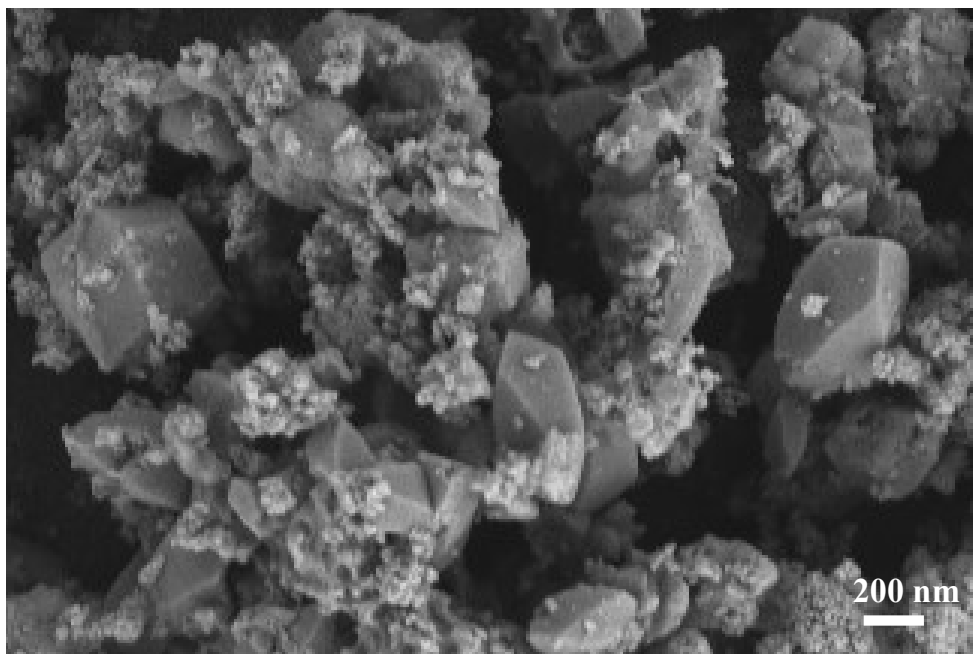

Fig. S2 SEM image of SA-Fe-Zn/ZIF.

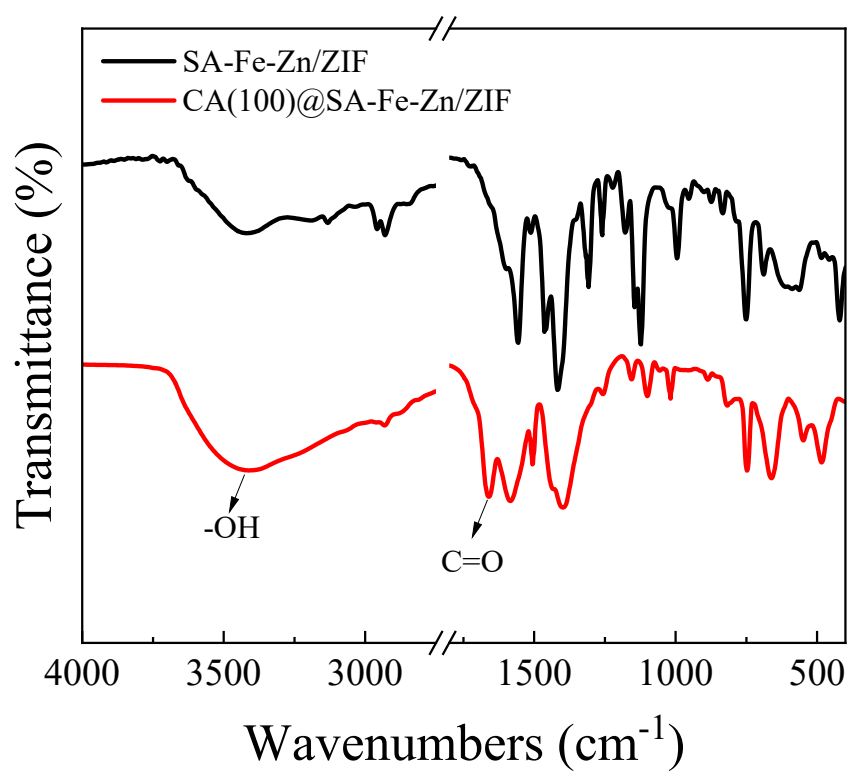

Fig. S3 The FT-IR spectra of SA-Fe-Zn/ZIF and CA(100)@SA-Fe-Zn/ZIF.

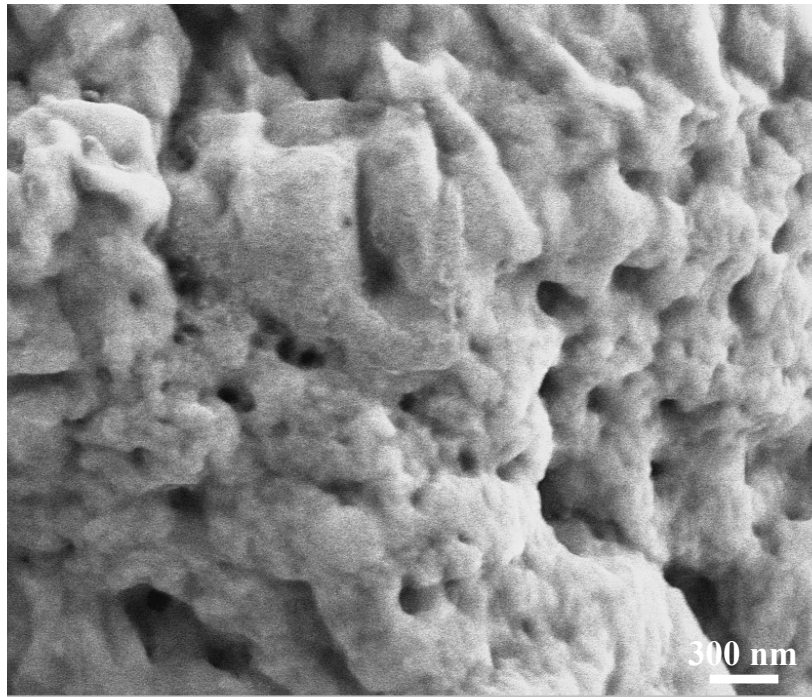

**Fig. S4** SEM image of CA(100)@SA-Fe-Zn/ZIF.

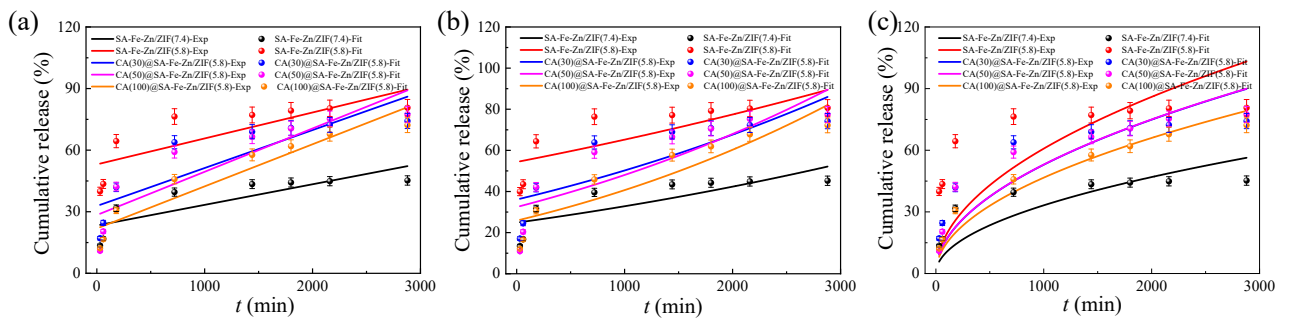

**Fig. S5** (a) Zero-order, (b) Hixson-Crowell, (c) Higuchi kinetic models fitting of data of release curves.

**Table S4** Release kinetic parameters for the data of release curves.

| Kinetic model            | Equations         | Sample               | pH  | a        | b                       | c                       | $R^2$         |
|--------------------------|-------------------|----------------------|-----|----------|-------------------------|-------------------------|---------------|
| First-order              | $y=a+b\exp(-x/c)$ | SA-Fe-Zn/ZIF         | 7.4 | 43.7212  | -36.288                 | 177.3302                | <b>0.9840</b> |
|                          |                   | SA-Fe-Zn/ZIF         | 5.8 | 78.94325 | -48.557                 | 159.7291                | <b>0.9901</b> |
|                          |                   | CA(30)@SA-Fe-Zn/ZIF  | 5.8 | 71.32489 | -58.485                 | 288.0121                | <b>0.9928</b> |
|                          |                   | CA(50)@SA-Fe-Zn/ZIF  | 5.8 | 71.75963 | -63.332                 | 306.2497                | <b>0.9658</b> |
|                          |                   | CA(100)@SA-Fe-Zn/ZIF | 5.8 | 72.97901 | -58.831                 | 947.50356               | <b>0.9813</b> |
| Second-degree polynomial | $y=a+bx+cx^2$     | SA-Fe-Zn/ZIF         | 7.4 | 18.70482 | 0.0272                  | $-6.517 \times 10^{-6}$ | 0.8685        |
|                          |                   | SA-Fe-Zn/ZIF         | 5.8 | 47.04435 | 0.0351                  | $-8.522 \times 10^{-6}$ | 0.8323        |
|                          |                   | CA(30)@SA-Fe-Zn/ZIF  | 5.8 | 24.88506 | 0.0481                  | $-1.121 \times 10^{-6}$ | 0.9118        |
|                          |                   | CA(50)@SA-Fe-Zn/ZIF  | 5.8 | 20.96713 | 0.0489                  | $-1.052 \times 10^{-5}$ | 0.9080        |
|                          |                   | CA(100)@SA-Fe-Zn/ZIF | 5.8 | 16.65511 | 0.0400                  | $-7.364 \times 10^{-6}$ | <b>0.9691</b> |
| Korsmeyer–Peppas         | $y=ax^b$          | SA-Fe-Zn/ZIF         | 7.4 | 8.2539   | 0.2230                  |                         | 0.9230        |
|                          |                   | SA-Fe-Zn/ZIF         | 5.8 | 27.0176  | 0.1439                  |                         | 0.9041        |
|                          |                   | CA(30)@SA-Fe-Zn/ZIF  | 5.8 | 9.63206  | 0.2653                  |                         | 0.9492        |
|                          |                   | CA(50)@SA-Fe-Zn/ZIF  | 5.8 | 6.89353  | 0.3106                  |                         | 0.9541        |
|                          |                   | CA(100)@SA-Fe-Zn/ZIF | 5.8 | 4.35537  | 0.3551                  |                         | <b>0.9937</b> |
| Zero-order               | $y=a+bx$          | SA-Fe-Zn-ZIF         | 7.4 | 23.2974  | 0.01004                 |                         | 0.63896       |
|                          |                   | SA-Fe-Zn-ZIF         | 5.8 | 53.0499  | 0.01265                 |                         | 0.65053       |
|                          |                   | CA(30)@SA-Fe-Zn-ZIF  | 5.8 | 32.7839  | 0.01850                 |                         | 0.74369       |
|                          |                   | CA(50)@SA-Fe-Zn-ZIF  | 5.8 | 28.3771  | 0.02109                 |                         | 0.78749       |
|                          |                   | CA(100)@SA-Fe-Zn-ZIF | 5.8 | 21.8443  | 0.02052                 |                         | 0.89784       |
| Hixson-Crowell           | $y=(a+bx)^3$      | SA-Fe-Zn-ZIF         | 7.4 | 2.9182   | $2.8383 \times 10^{-4}$ |                         | 0.63896       |
|                          |                   | SA-Fe-Zn-ZIF         | 5.8 | 3.78785  | $2.3739 \times 10^{-4}$ |                         | 0.61799       |
|                          |                   | CA(30)@SA-Fe-Zn-ZIF  | 5.8 | 3.30418  | $3.8533 \times 10^{-4}$ |                         | 0.68294       |
|                          |                   | CA(50)@SA-Fe-Zn-ZIF  | 5.8 | 3.18931  | $4.4585 \times 10^{-4}$ |                         | 0.72363       |
|                          |                   | CA(100)@SA-Fe-Zn-ZIF | 5.8 | 2.95683  | $4.8216 \times 10^{-4}$ |                         | 0.83427       |
| Higuchi                  | $y=ax^{1/2}$      | SA-Fe-Zn-ZIF         | 7.4 | 1.04979  |                         |                         | 0.38315       |
|                          |                   | SA-Fe-Zn-ZIF         | 5.8 | 1.92255  |                         |                         | -1.2126       |
|                          |                   | CA(30)@SA-Fe-Zn-ZIF  | 5.8 | 1.6748   |                         |                         | 0.66715       |
|                          |                   | CA(50)@SA-Fe-Zn-ZIF  | 5.8 | 1.67694  |                         |                         | 0.82039       |
|                          |                   | CA(100)@SA-Fe-Zn-ZIF | 5.8 | 1.47562  |                         |                         | 0.93307       |



## Reference

- 1 H. Zhao, Y. Zhao, X. Zhao and D. Liu, *ACS Appl. Bio Mater.*, 2019, **64**, 18, 51-1858.
- 2 H. Zhao, Y. Zhao, X. Zhao and D. Liu, *J. Mol. Struc.*, 2022, **1263**, 133121.
